# Supplementary material for: Factors Affecting the Vineyard Populational Diversity of Plasmopara viticola
Source: PubMed Central journal article supplement — Plant Pathol J. 2019 Apr 1;35(2):125–36. doi: 10.5423/PPJ.OA.09.2018.0194 (PMC6464202; doi:10.5423/ppj.oa.09.2018.0194), 2019-04-01
Supplement: ppj-35-125_suppl.pdf [file ppj-35-125_suppl.pdf]

**Supplementary Table 1.** Analyzed SSR markers

| Marker | Primer label | Expected allele number | Expected size range (bp) | Described in           |
|--------|--------------|------------------------|--------------------------|------------------------|
| GIOP   | NO           | PRESENCE/ABSENCE       | 208                      | Valsesia et al. (2005) |
| CES    | D4           | 12                     | 135-177                  | Delmote et al. (2006)  |
| GOB    | D4           | 27                     | 198-376                  | Gobin et al. (2003)    |
| Pv 17  | D3           | 2                      | 147-149                  | Delmote et al. (2006)  |
| Pv 13  | D3           | 3                      | 215-219                  | Delmote et al. (2006)  |
| Pv 31  | D3           | 3                      | 243-273                  | Delmote et al. (2006)  |
| ISA    | D2           | 6                      | 111-143                  | Gobin et al. (2003)    |
| BER    | D2           | 3                      | 172-174                  | Gobin et al. (2003)    |
